# Supplementary material
Source: publisher figshare collection journal article supplement (https://karger.figshare.com/ndownloader/files/24453140)
Supplement: Supplementary file 1 [file 24453140]

**Supplementary Table 1.** Diagnosis and triage decisions of patients with medical conditions other than stroke or stroke mimics

| **Condition** | **Stroke mimic**  **(FAST +)** | **Left in Community** | **A&E** | **Other disease**  **(FAST -)** | **Left in Community** | **A&E** |
| --- | --- | --- | --- | --- | --- | --- |
| Alcohol intoxication | 1 |  | 1 | 1 | 1 |  |
| Anaemia |  |  |  | 1 |  | 1 |
| Antibiotic related side effects |  |  |  | 1 | 1 |  |
| Anxiety | 1 | 1 |  | 5 | 4 | 1 |
| Bell’s palsy | 2 | 2 |  |  |  |  |
| Dehydration/heat stroke |  |  |  | 2 | 1 | 1 |
| Disc prolapse/  musculosceletal problems | 1 | 1 |  | 3 | 2 | 1 |
| Hypertensive crisis/Angina | 3 |  | 3 | 1 |  | 1 |
| Hypoglycaemia | 1 |  | 1 | 3 | 2 | 1 |
| Hyponatriaemia | 1 |  | 1 |  |  |  |
| Infection/sepsis | 3 | 1 | 2 | 6 | 1 | 5 |
| Labyrinthitis | 1 | 1 |  |  |  |  |
| Migraine | 7* | 1 | 3 |  |  |  |
| Parkinson’s disease/  dementia | 2 |  | 2 | 2 | 1 | 1 |
| Psychosomatic symptoms | 3† |  | 1 |  |  |  |
| Pulmonary embolism |  |  |  | 1 |  | 1 |
| Seizures |  |  |  | 2 |  | 2 |
| Shunt dysfunction |  |  |  | 1 |  | 1 |
| Subdural haemorrhage | 2 |  | 2 |  |  |  |
| Syncope | 3 | 1 | 2 | 8 | 4 | 4 |
| Vertigo |  |  |  | 1 | 1 |  |
| Data are displayed as absolute numbers. Results of FAST score on scene were used for categorisation.  * 4 of these patients were transported to stroke unit as stroke suspects. † 2 patients were transported to stroke unit as stroke suspects. | | | | | | | |
